# Supplementary material for: Novel biomolecule-assisted interlayer anion-controlled layered double hydroxide as an efficient sorbent for arsenate removal
Source: Royal Society of Chemistry journal article supplement (doi:10.1039/c7ta03056h), 2017-01-01
Supplement: c7ta03056h1.pdf [file c7ta03056h1.pdf]

## ***Electronic Supplementary Information***

### **Novel biomolecule-assisted interlayer anion-controlled layered double hydroxide as an efficient sorbent for arsenate removal**

**Paulmanickam Koilraj<sup>a</sup>, Keiko Sasaki<sup>a,\*</sup>, Kannan Srinivasan<sup>b</sup>**

*<sup>a</sup>Department of Earth Resources Engineering, Faculty of Engineering, Kyushu University, Fukuoka 819-0395, Japan*

*<sup>b</sup>Inorganic Materials and Catalysis Division, CSIR-Central Salt and Marine Chemicals Research Institute, Council of Scientific and Industrial Research (CSIR), GB Marg, Bhavnagar-364 002, India.*

---

\*Corresponding Author

Prof. Dr. Keiko Sasaki

Department of Earth Resources Engineering

Faculty of Engineering

Kyushu University

Fukuoka 819-0395

Japan

Tel./Fax. +81 92 802 3338

Email: [keikos@mine.kyushu-u.ac.jp](mailto:keikos@mine.kyushu-u.ac.jp)

#### **Author Information**

Paulmanickam Koilraj - [koilraj@gmail.com](mailto:koilraj@gmail.com); [koilraj@mine.kyushu-u.ac.jp](mailto:koilraj@mine.kyushu-u.ac.jp)

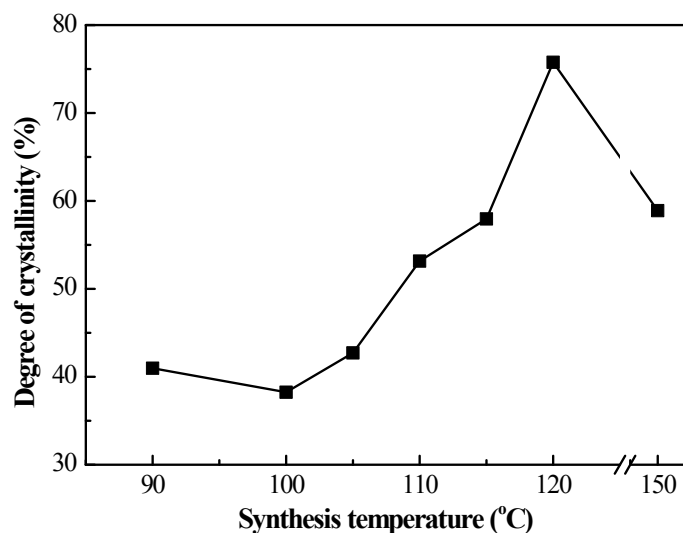

**Fig. S1.** Change in the degree of crystallinity of MgAl-LDHs with synthesis temperature.

The degree of crystallinity was calculated by the addition of 20 wt.% SiO<sub>2</sub> by the internal standard method. The phase fraction of each component was calculated from the PXRD patterns highest intensity peak area of SiO<sub>2</sub> and LDH phases as shown in the following equation:<sup>1</sup>

$$Phase\ fraction\ of\ LDH\ (F_{LDH}) = \frac{Area\ of\ LDH_{(100\% \text{ intensity peak})}}{(Area\ of\ LDH_{(100\% \text{ intensity peak})} + Area\ of\ standard_{(100\% \text{ intensity peak})}}$$

(i)

The degree of crystallinity of the samples were calculated by the following equation:<sup>2</sup>

$$Degree\ of\ Crystallinity\ (\%) = F_{LDH} \times \frac{F_S (actual)}{F_S} \left( \frac{1}{1 - F_S (actual)} \right) \times 100$$

(ii)

Where,  $F_{LDH}$  and  $F_s$  are the phase fraction of LDH and standard respectively, and  $F_s (actual)$  is the originally added fraction of internal standard.

## References

1. M. H. A. Rahaman, M. U. Khandaker, Z. R. Khan, M. Z. Kufian, I. S. Noor and A. K. Arof, *Phys. Chem. Chem. Phys.*, 2014, **16**, 11527-11537.
2. R. Snellings, L. Machiels, G. Mertens and J. Elsen, *Geologica Belgica*, 2010, **13**, 183-196.

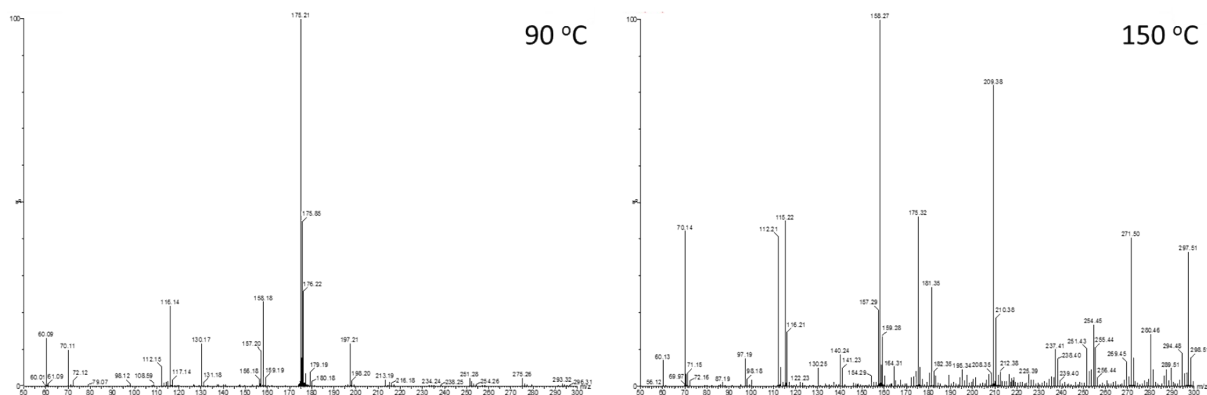

**Fig. S2** LC-MS spectra of supernatants obtained after LDH synthesis at different temperatures.

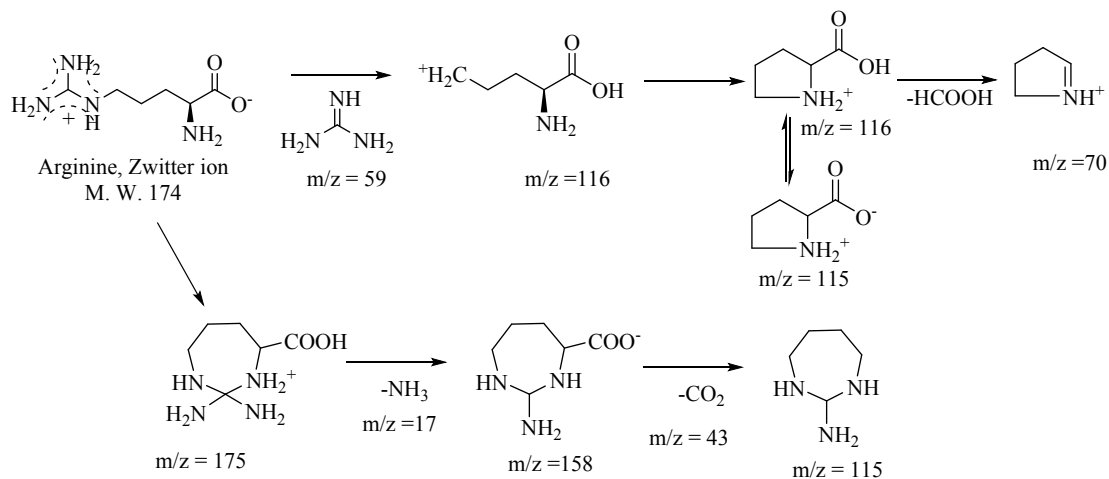

**Scheme S1.** Thermal decomposition of amino acid during hydrothermal treatment at higher temperatures.<sup>1</sup>

## Reference

1. J. J. Zwinselman, N. M. M. Nibbering, J. van der Greef and M. C. T. N. De Brauw, *Org. Mass Spectrom.*, 1983, **18**, 525-529.

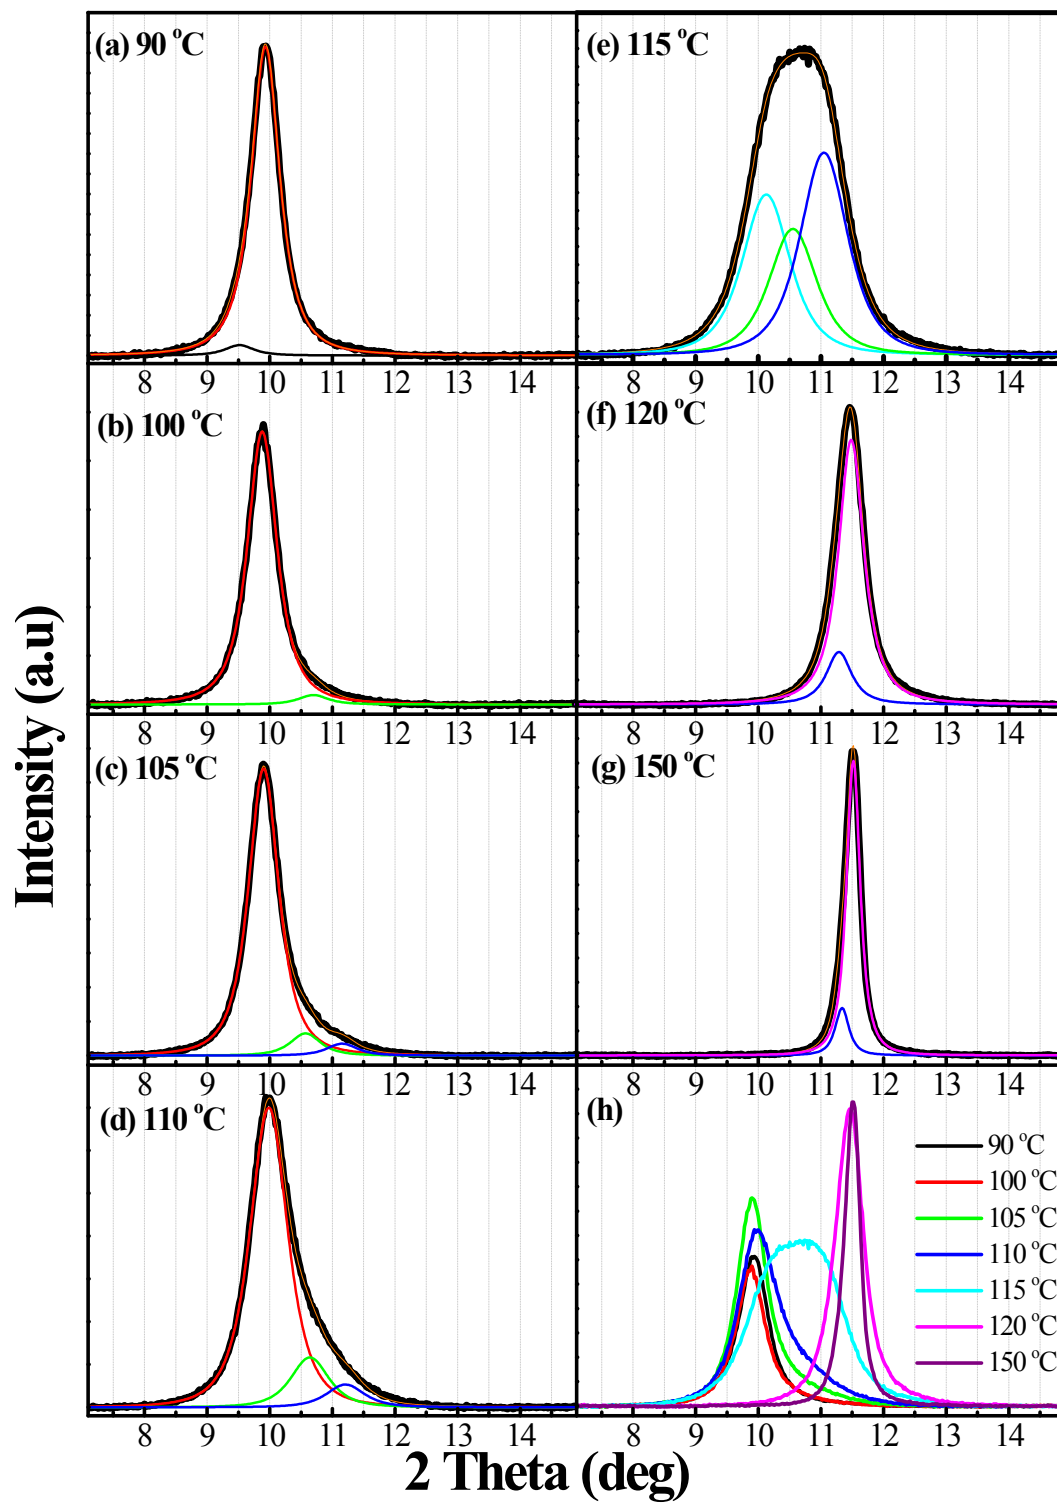

**Fig. S3** PXRD peak fitting of MgAl LDHs synthesized at various temperatures (a-g) and (h) all of the LDHs.

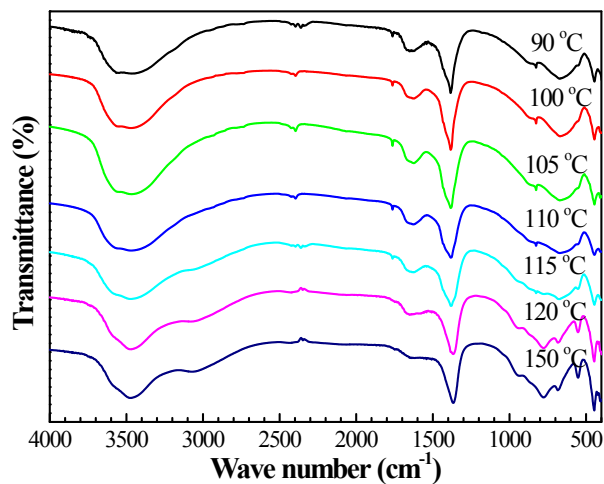

**Fig. S4** FT-IR spectra of MgAl-LDHs synthesized at various temperatures.

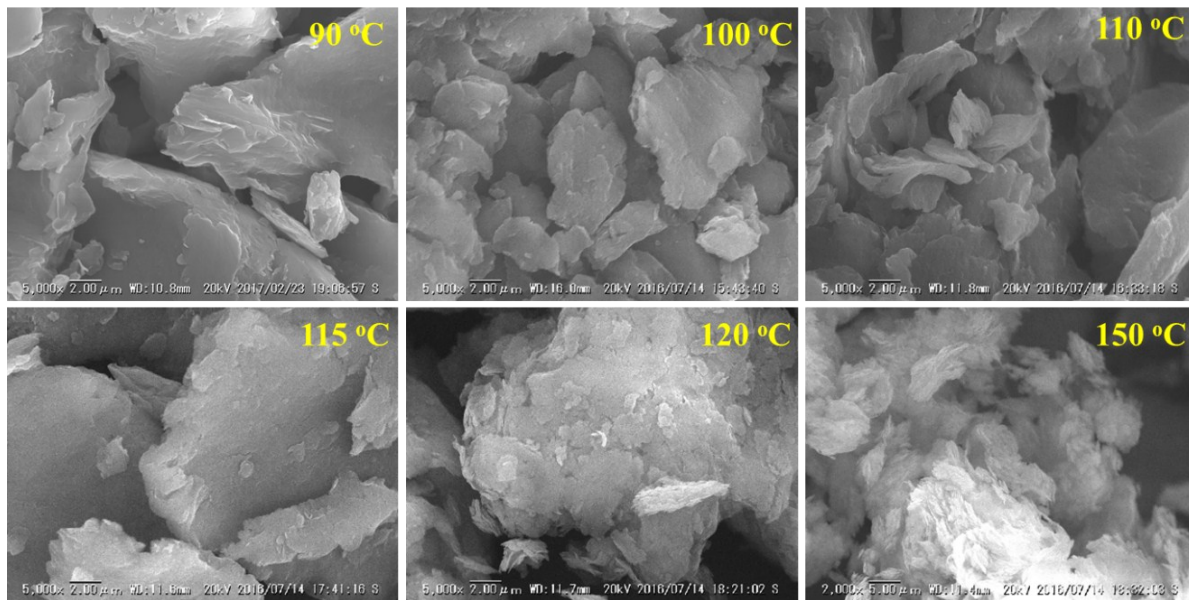

**Fig. S5** SEM images of MgAl-LDHs synthesized at various temperatures (scale bar = 2 μm).

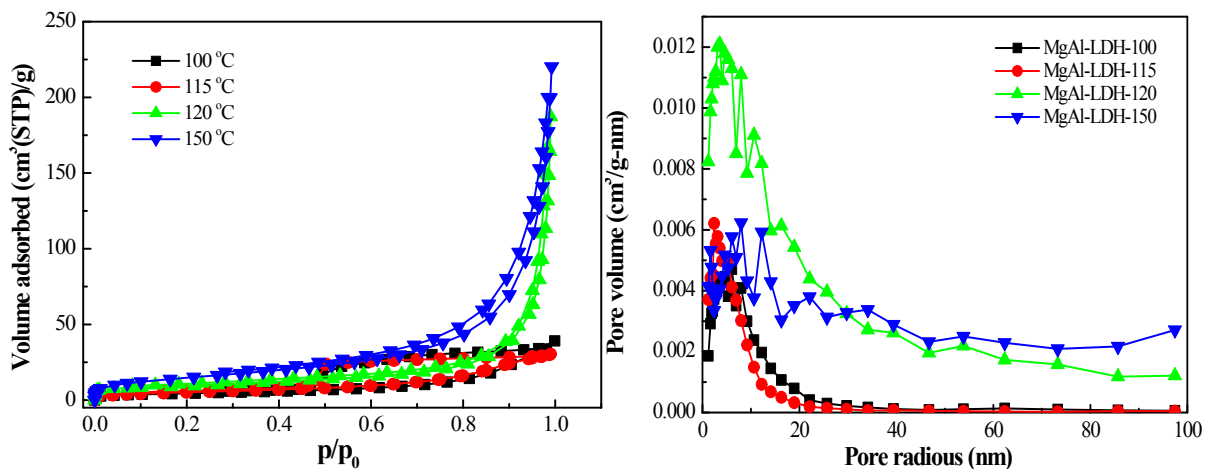

Fig. S6 Nitrogen adsorption-desorption isotherms of MgAl-LDHs synthesized at various temperatures.

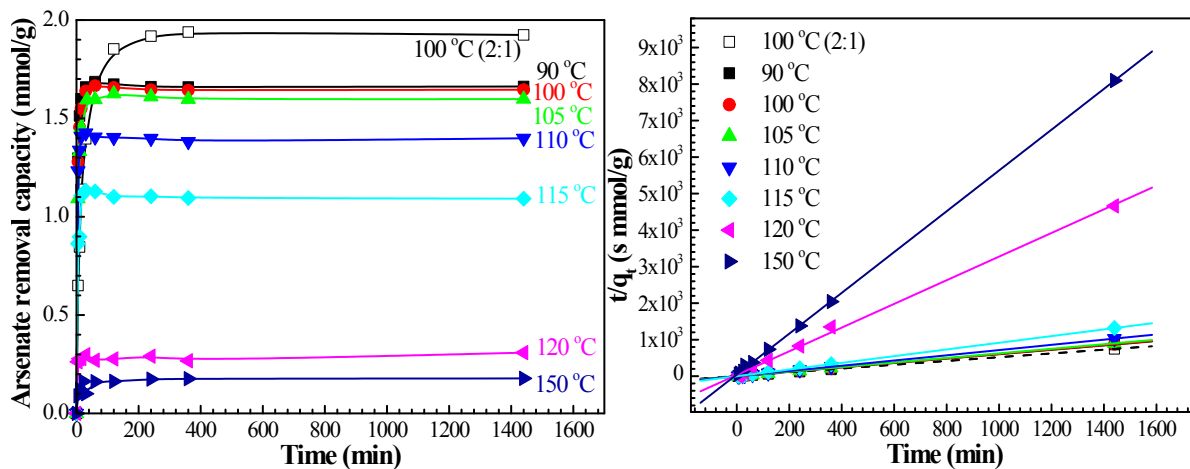

Fig. S7 Kinetic linear fittings of Ho's pseudo-second order model.

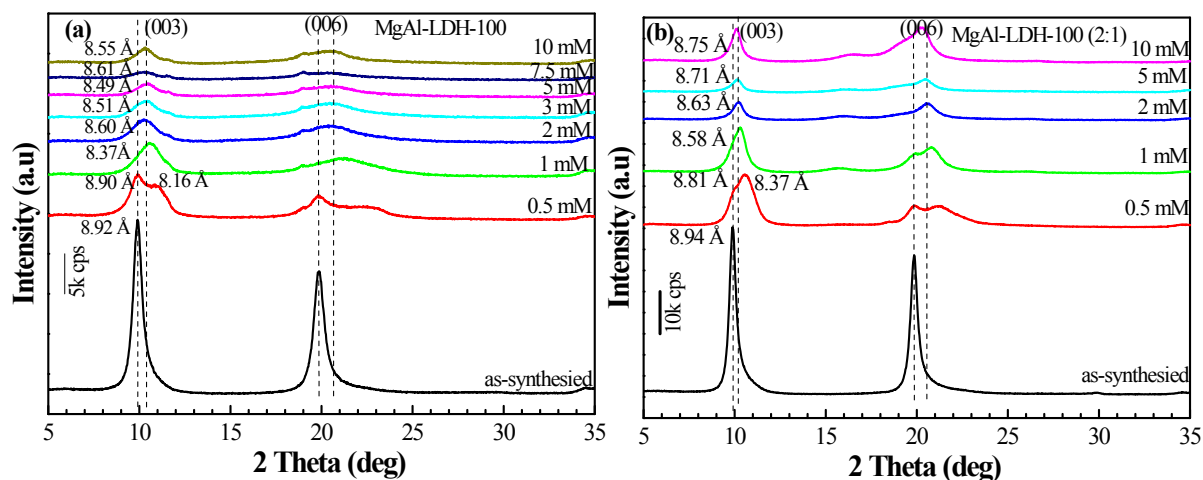

**Fig. S8** (a) PXR D patterns of (a) MgAl-LDH-100 and (b) MgAl-LDH-100 (2:1) after sorption of arsenate at different concentrations.

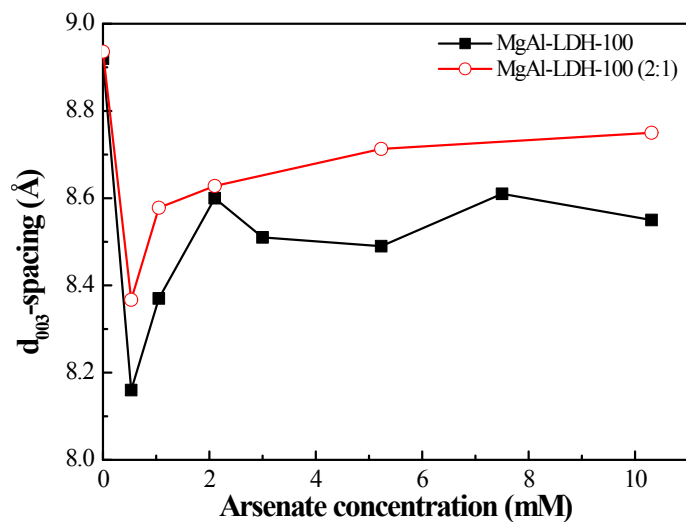

**Fig. S9** The  $d_{003}$ -spacing of MgAl-LDH-100 and MgAl-LDH-100 (2:1) after sorption of arsenate at different concentrations.

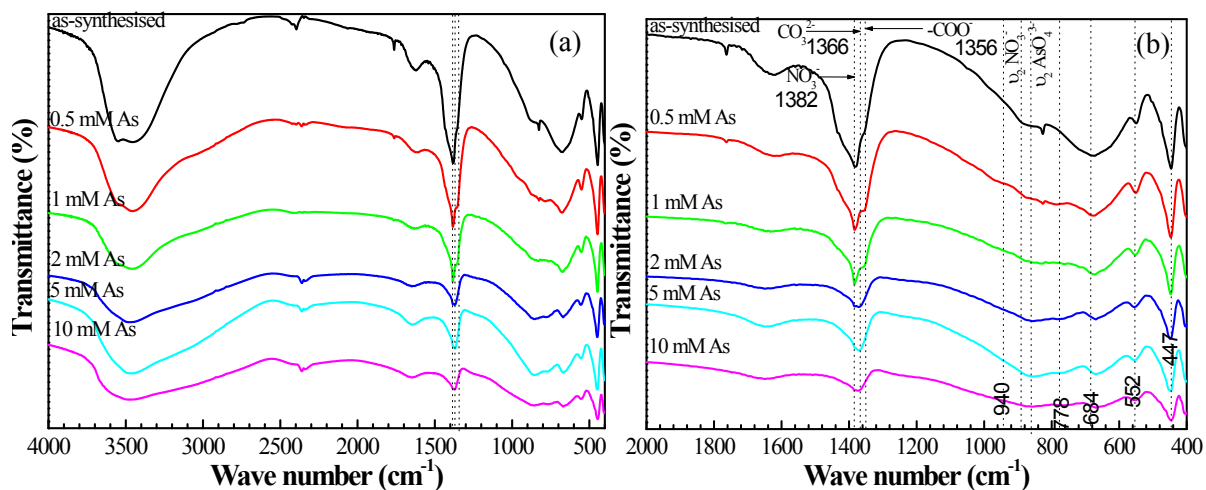

**Fig. S10** (a) FT-IR spectra of MgAl-LDH-100 (2:1) after sorption of arsenate at different concentrations (b) and their expanded regions.

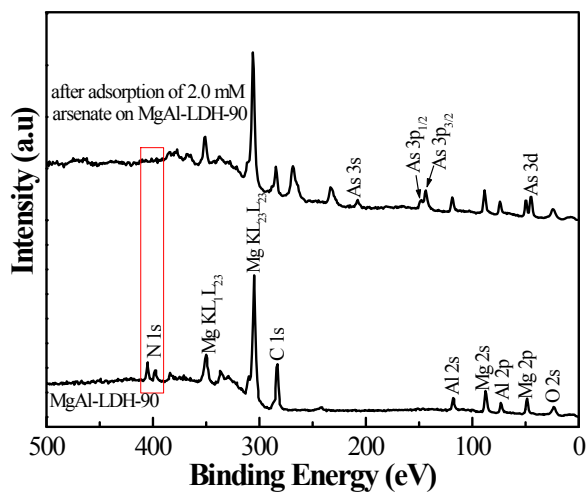

**Fig. S11** XPS survey spectra of MgAl-LDH-90 before and after adsorption of 2.0 mM arsenate.
